# Supplementary material for: Diverse and active archaea communities occur in non-disinfected drinking water systems–Less activity revealed in disinfected and hot water systems
Source: PubMed Central journal article supplement — Water Res X. 2021 Apr 27;12:100101. doi: 10.1016/j.wroa.2021.100101 (PMC8131914; doi:10.1016/j.wroa.2021.100101), 2021-04-27
Supplement: mmc3.pdf [file mmc3.pdf]

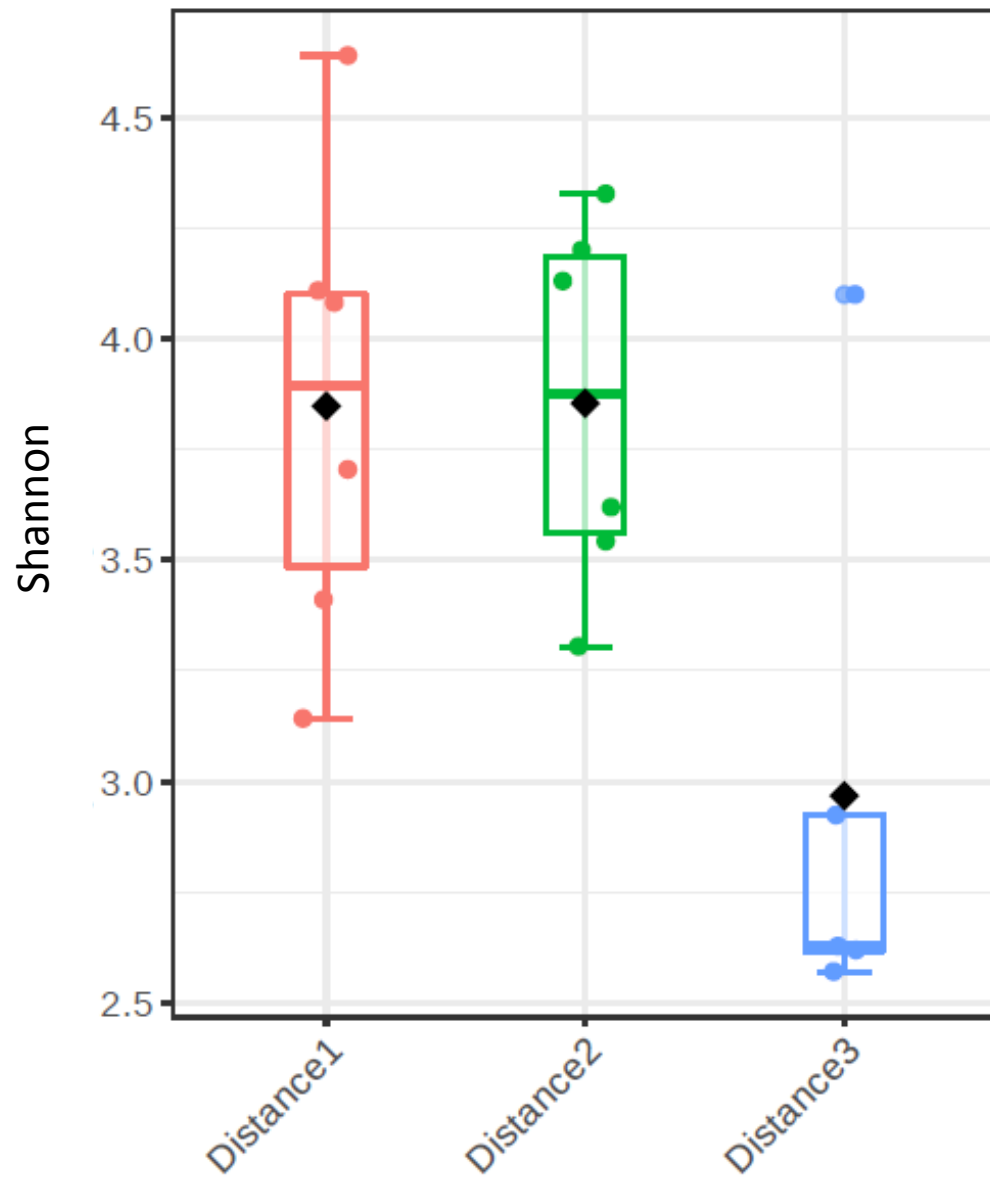

**Figure S1.** Boxplot of the alpha diversity Shannon indice of DWDS A (RNA) cold water by the distance from the waterworks.

### Additional file 3

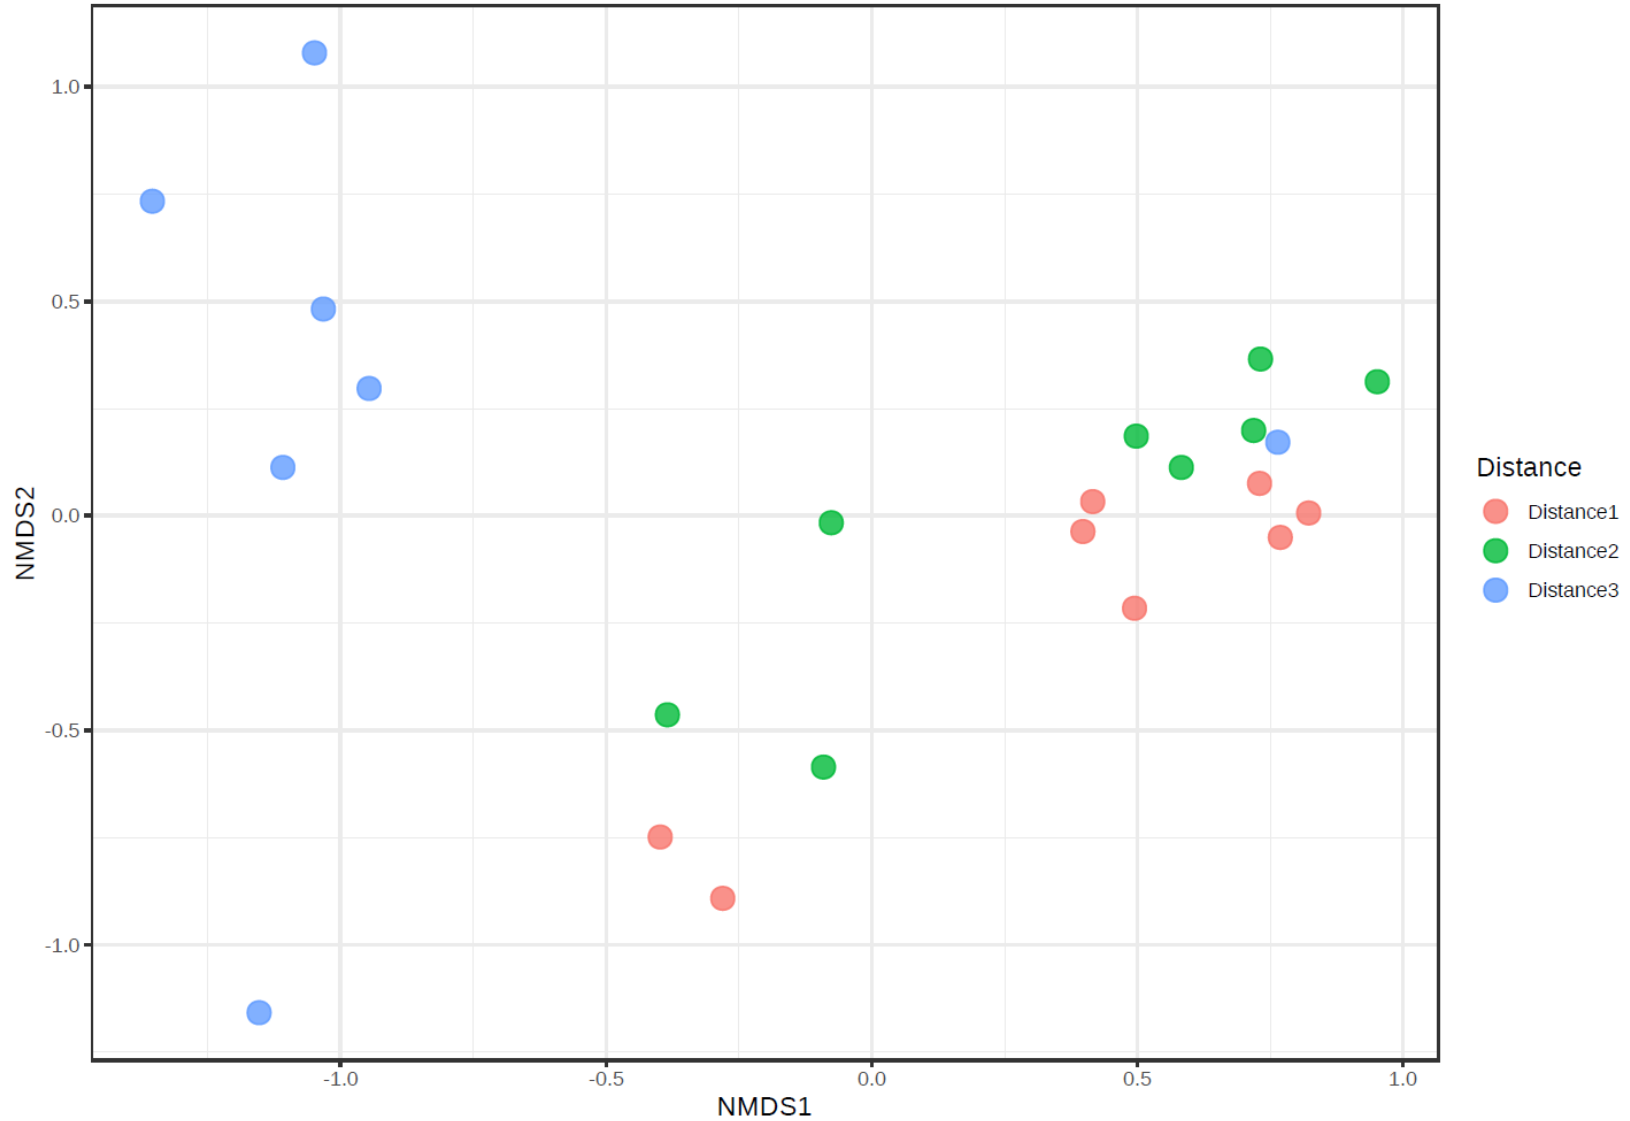

**Figure S2.** Beta-diversity (Bray-Curtis) of DWDS A (DNA) cold water by the distance from the waterworks. ANOSIM ( $R = 0.57$ ,  $P < 0.001$ , stress = 0.09).

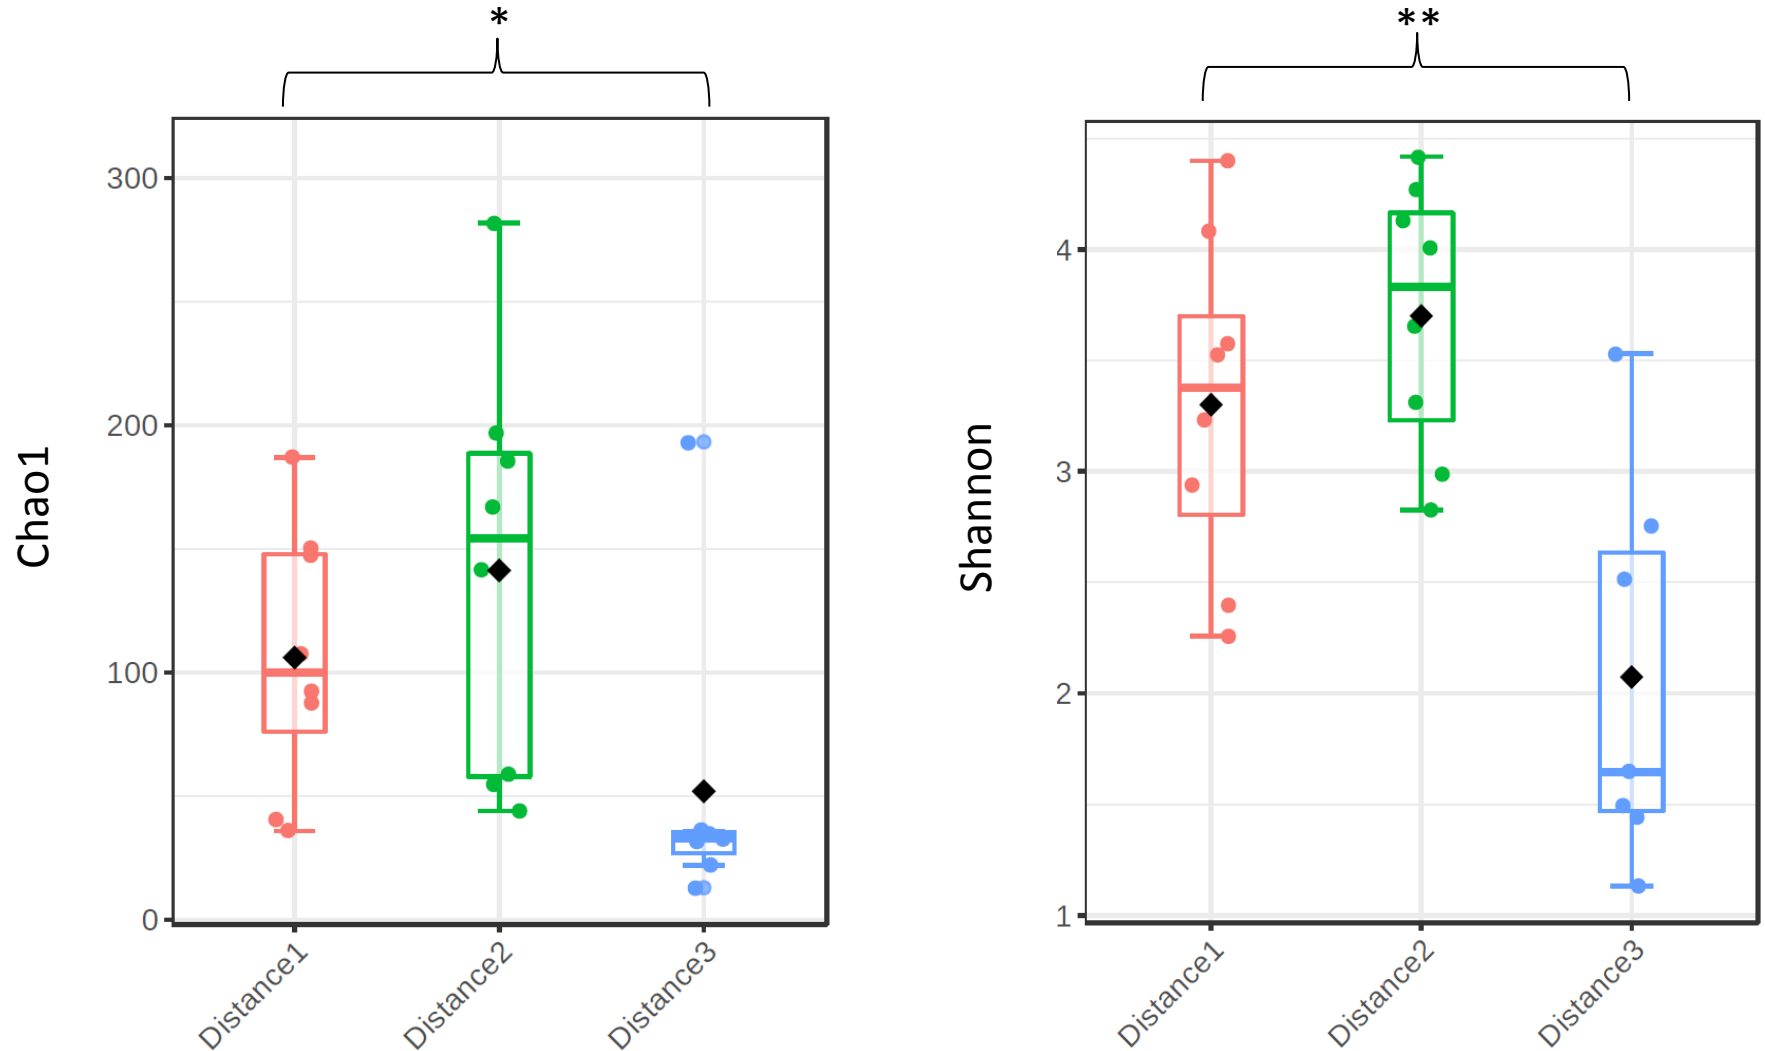

**Figure S3.** Boxplots of the alpha diversity indices by Chao1 (left figure) and Shannon (right figure) of DWDS A (DNA) cold water by the distance from the waterworks. Statistical significance between distance: \* $P < 0.05$ , \*\* $P < 0.01$ , \*\*\* $P < 0.001$ .

## Additional file 3

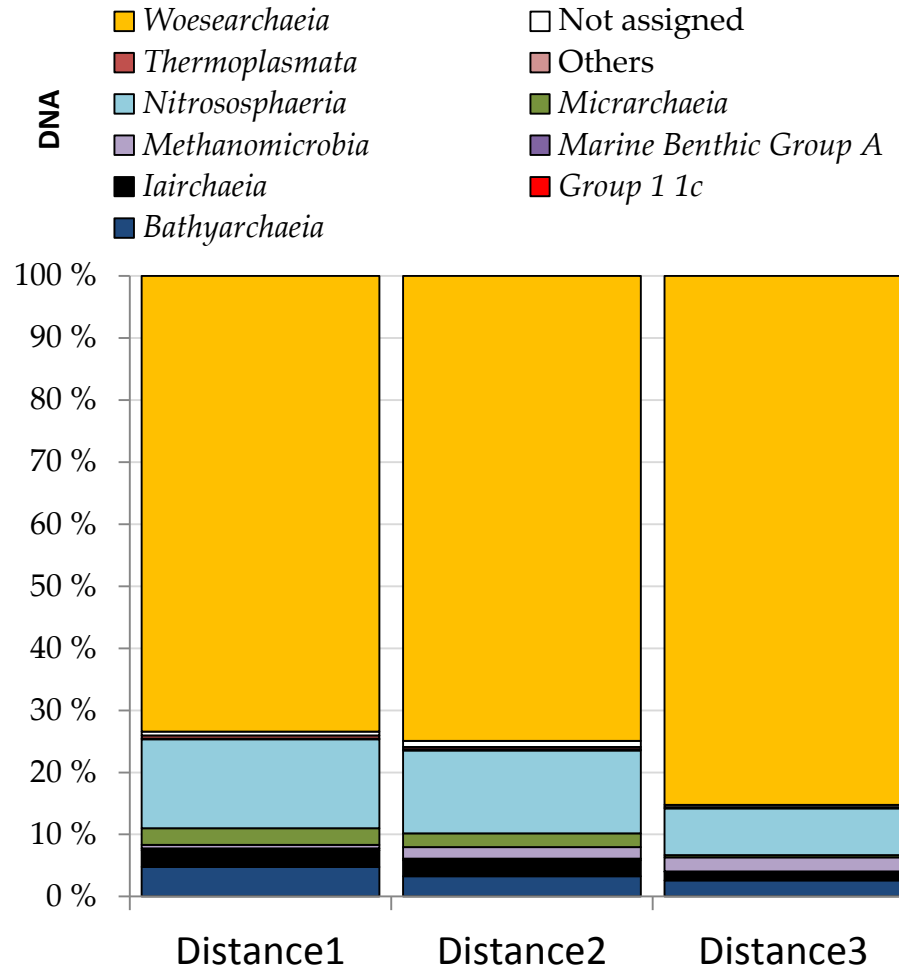

**Figure S4.** Relative abundance (%) of archaeal classes in DWDS A (DNA) cold water between different distances from the waterworks.
