# Supplementary material for: Diverse and active archaea communities occur in non-disinfected drinking water systems–Less activity revealed in disinfected and hot water systems
Source: PubMed Central journal article supplement — Water Res X. 2021 Apr 27;12:100101. doi: 10.1016/j.wroa.2021.100101 (PMC8131914; doi:10.1016/j.wroa.2021.100101), 2021-04-27
Supplement: mmc4.pdf [file mmc4.pdf]

Additional file 4

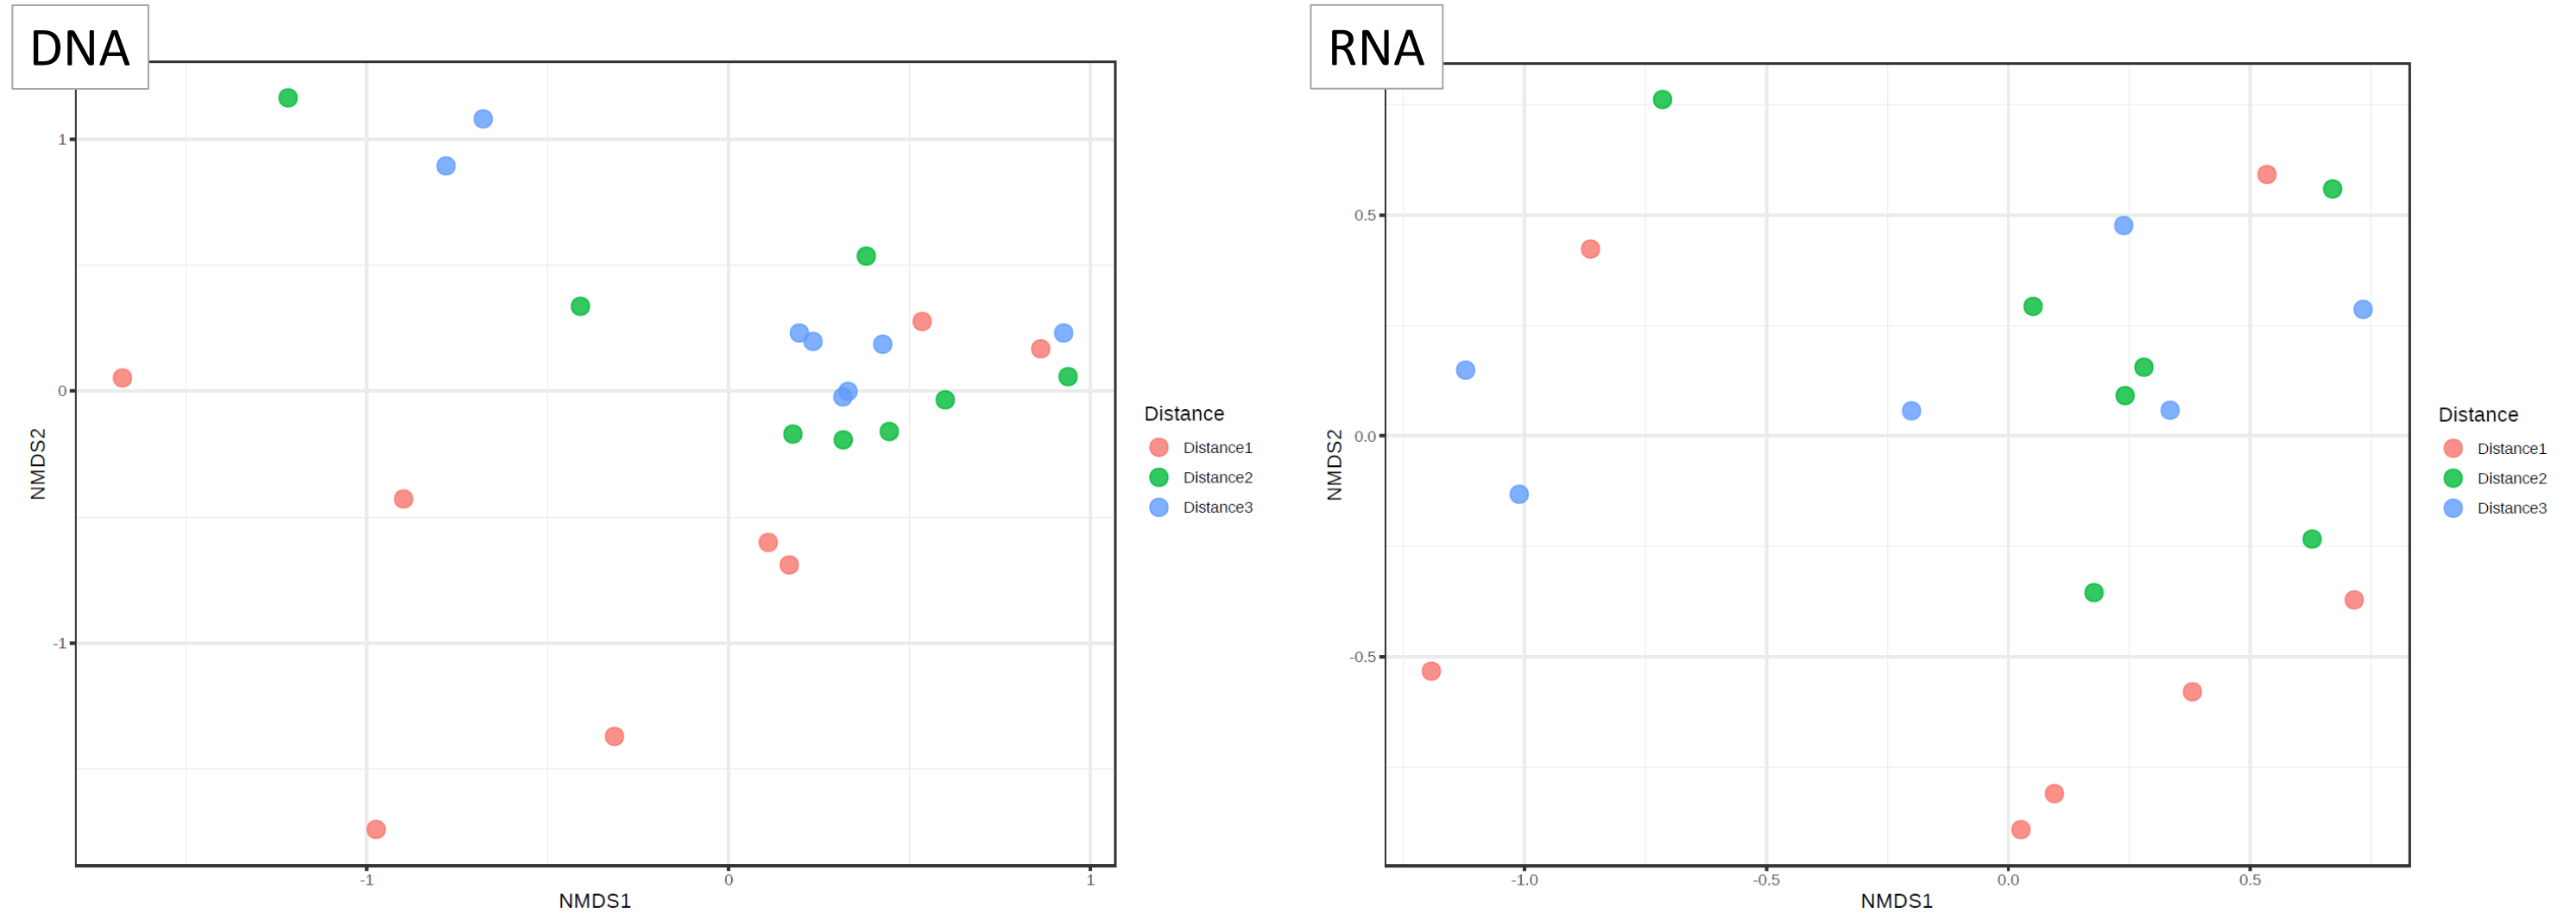

**Figure S5.** Beta-diversities (Bray-Curtis) of DWDS B cold water by the distance from the waterworks. Left figure DNA ( $R = 0.24$ ,  $P < 0.004$ , ANOSIM) and right figure RNA ( $R = 0.15$ ,  $P < 0.033$ , ANOSIM).

Additional file 4

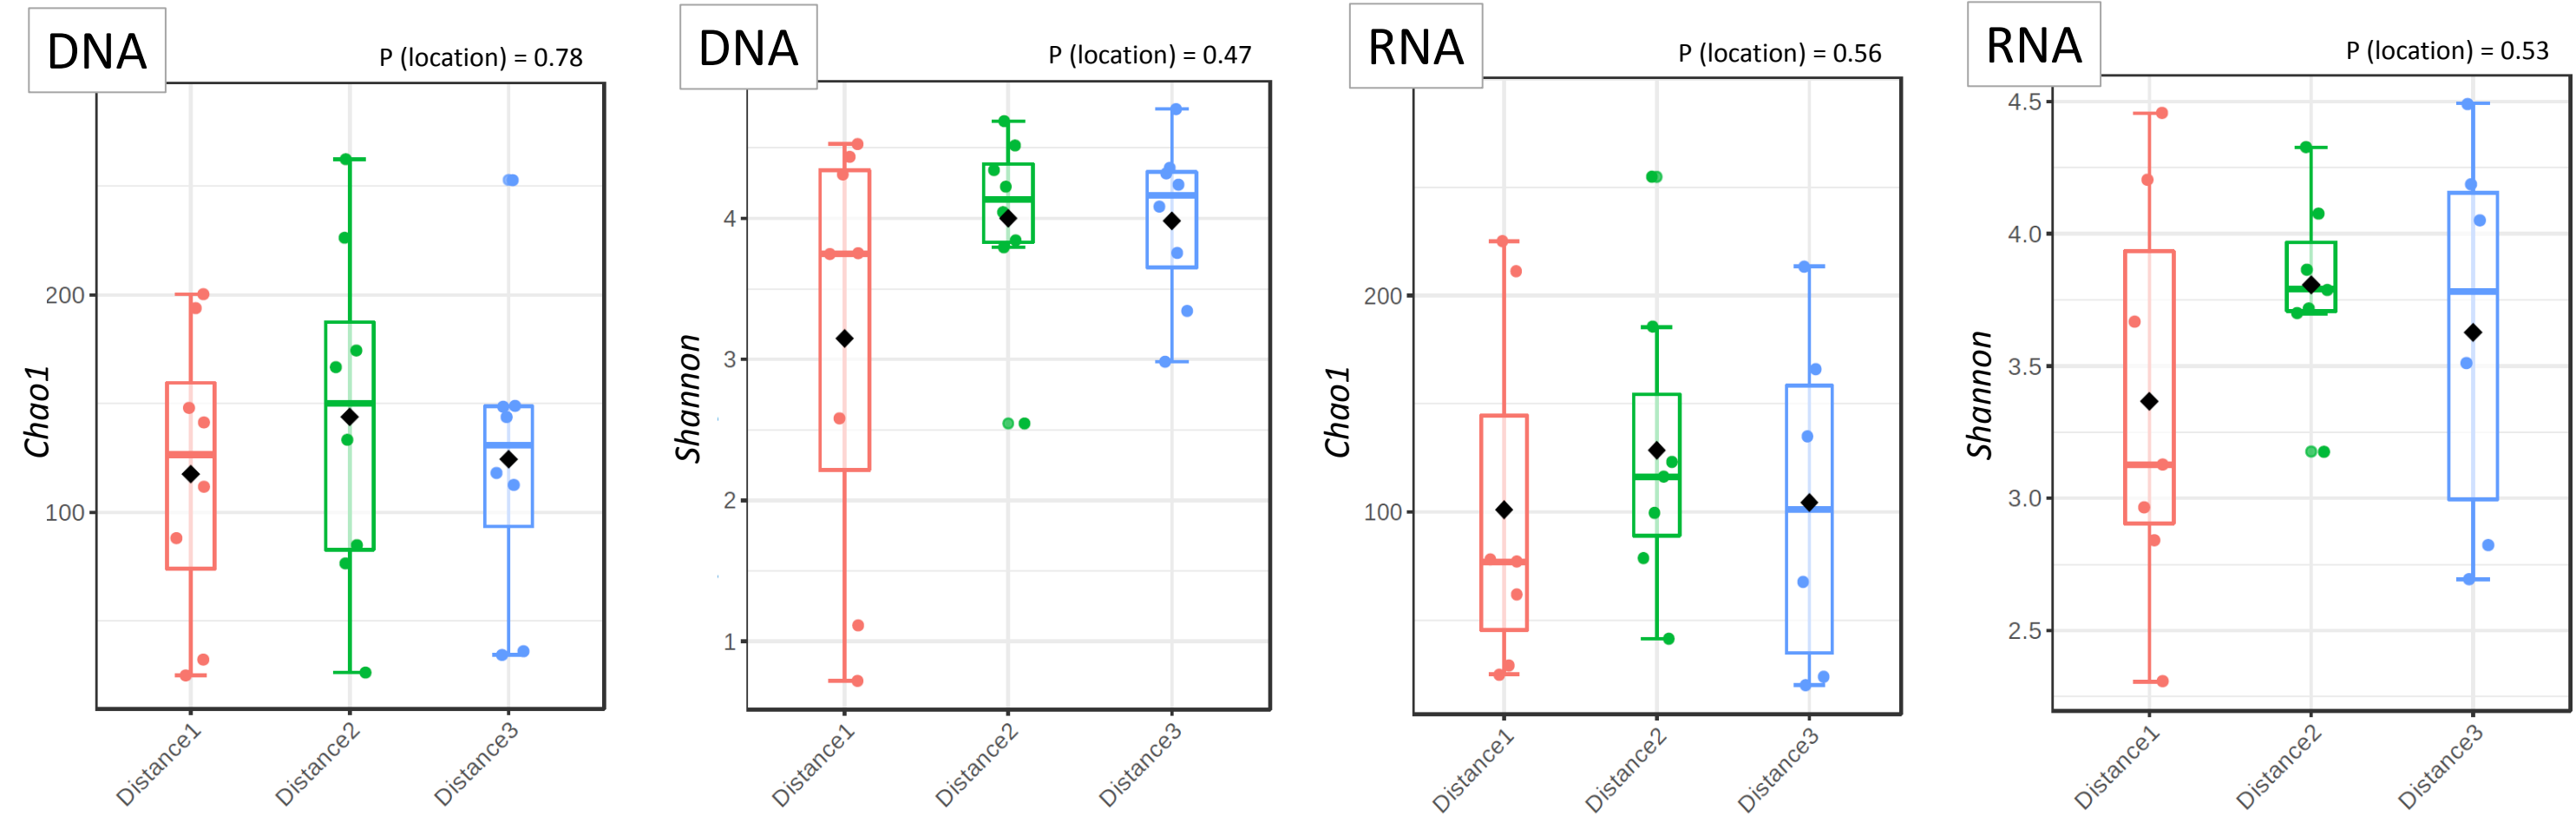

**Figure S6.** Boxplots of the alpha diversity indices by Chao1 and Shannon DNA of DWDS A cold water by the distance from the waterworks. Statistical significance between locations ( $P > 0.05$ ).
