# Supplementary material for: Diverse and active archaea communities occur in non-disinfected drinking water systems–Less activity revealed in disinfected and hot water systems
Source: PubMed Central journal article supplement — Water Res X. 2021 Apr 27;12:100101. doi: 10.1016/j.wroa.2021.100101 (PMC8131914; doi:10.1016/j.wroa.2021.100101), 2021-04-27
Supplement: mmc5.pdf [file mmc5.pdf]

Additional file 5

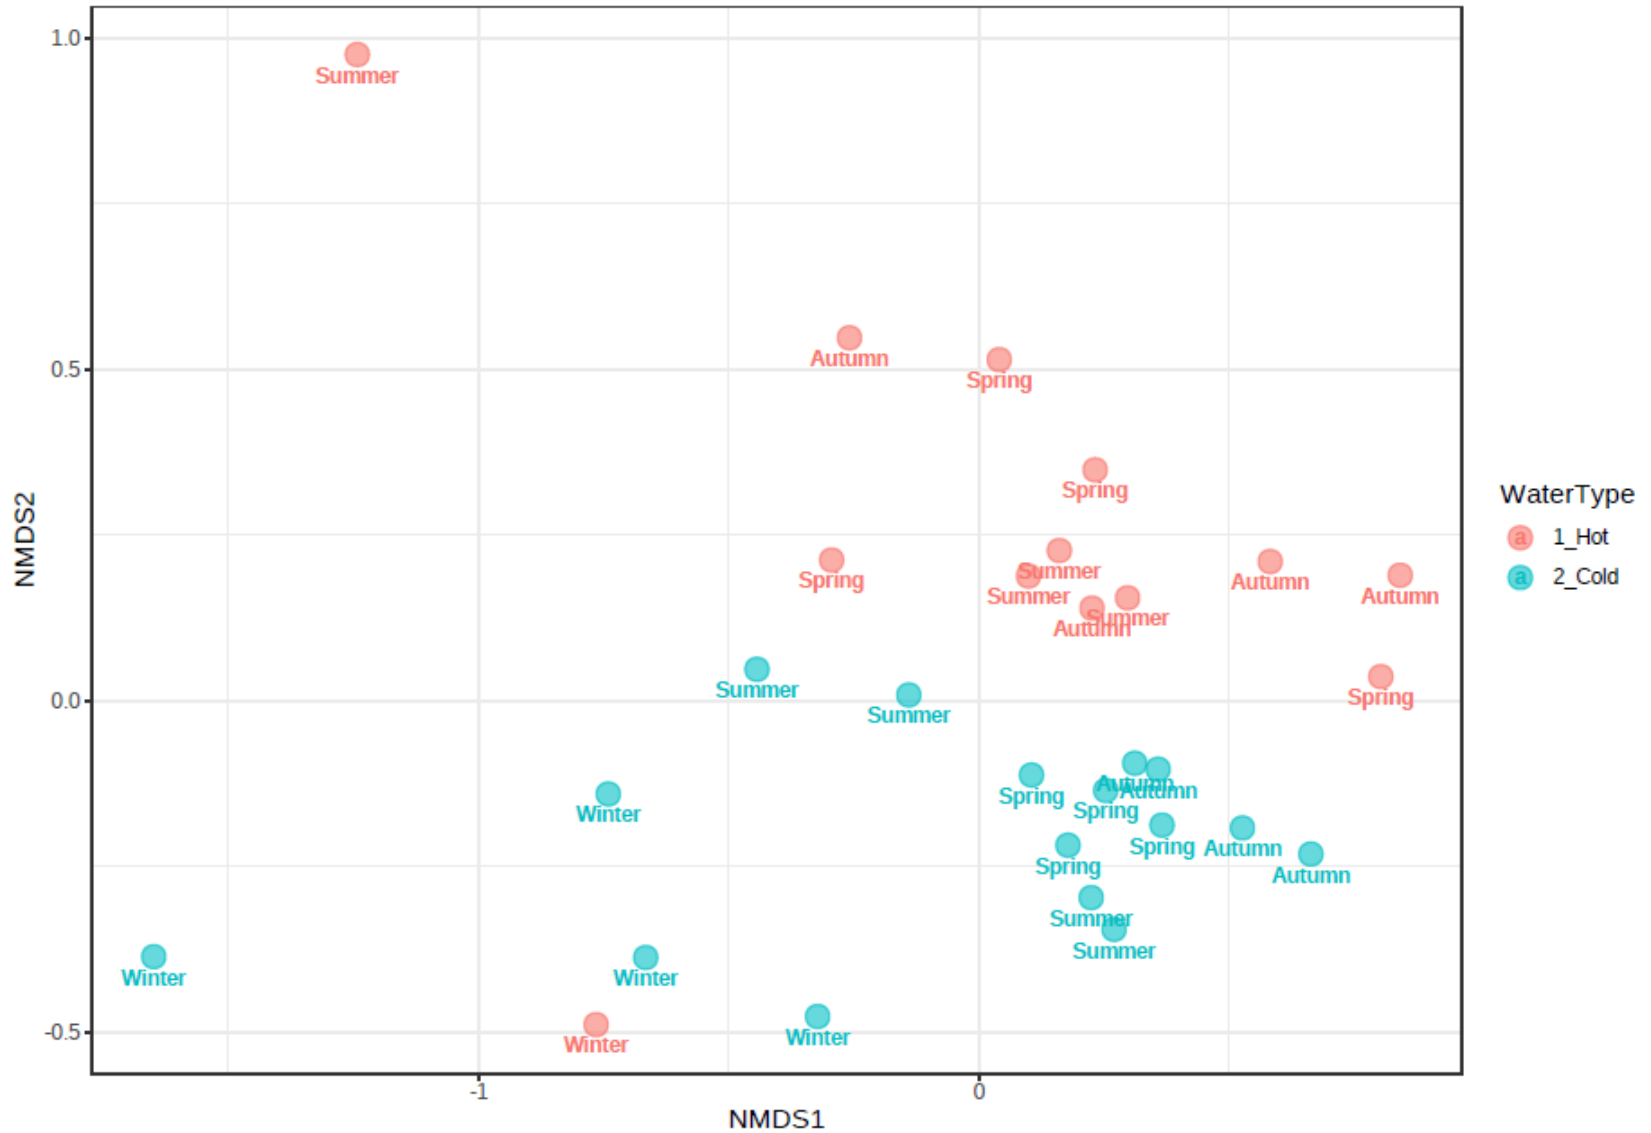

**Figure S7.** Beta-diversity (Bray-Curtis) of DWDS A–B (DNA) in cold and hot water from sampling location 2 . ANOSIM ( $R = 0.37$ ,  $P < 0.001$ , stress = 0.13).
